# Supplementary material for: In-Situ Growth of Au on KTaO3 Sub-Micron Cubes via Wet Chemical Approach for Enhanced Photodegradation of p-Nitrophenol
Source: PubMed Central journal article supplement (PMC6632096; doi:10.3390/ma12121950), 2019-06-17
Supplement: materials-12-01950-s001.pdf [file materials-12-01950-s001.pdf]

Supplementary

# In-situ Growth of Au on KTaO<sub>3</sub> Sub-Micron Cubes via Wet Chemical Approach for Enhanced Photodegradation of p-Nitrophenol

Shengding Chang <sup>1</sup>, Muwei Ji <sup>1,2</sup>, Changxu Yan <sup>1</sup>, Kai Zhang <sup>1</sup>, Qian Deng <sup>1</sup>, Jian Xu <sup>2</sup>, Caizhen Zhu <sup>2</sup>, Bo Li <sup>1</sup> and Jin Wang <sup>1,\*</sup>

<sup>1</sup> Graduate School at Shenzhen, Tsinghua University, Shenzhen 518055, China; csd16@mails.tsinghua.edu.cn (S.C.); jimawei@163.com (M.J.); ycx17@mails.tsinghua.edu.cn (C.Y.); zhangkai17@mails.tsinghua.edu.cn (K.Z.); dq17@mails.tsinghua.edu.cn (Q.D.); boli@mail.tsinghua.edu.cn (B.L.)

<sup>2</sup> Institute of Low-dimensional Materials Genome Initiative, College of chemistry and environmental engineering, Shenzhen University, Shenzhen 518060, China; jxu@iccas.ac.cn (J.X.); makingway@163.com (C.Z.)

\* Correspondence: wang.jin@sz.tsinghua.edu.cn

Received: 30 April 2019; Accepted: 14 June 2019; Published: date

**Table 1.** Lattice mismatches of KTaO<sub>3</sub> and Au nanoparticles.

| Au                   | Au (111)                   | Au (111)                   | Au (111)                   | Au (200)                   | Au (200)                   | Au (200)                   |
|----------------------|----------------------------|----------------------------|----------------------------|----------------------------|----------------------------|----------------------------|
| KTaO <sub>3</sub>    | KTaO <sub>3</sub><br>(100) | KTaO <sub>3</sub><br>(110) | KTaO <sub>3</sub><br>(111) | KTaO <sub>3</sub><br>(100) | KTaO <sub>3</sub><br>(110) | KTaO <sub>3</sub><br>(111) |
| Lattice Mismatch (%) | 18.1 <sup>a</sup>          | 16.7 <sup>b</sup>          | 2.17 <sup>b</sup>          | 2.51 <sup>a</sup>          | 27.7 <sup>b</sup>          | 11.3 <sup>b</sup>          |

<sup>a</sup> n = 2; <sup>b</sup> n = 1.

The mismatches are calculated by the definition given by the equation:

$$\text{Mismatch} = \frac{|\text{lattice parameter of KTaO}_3 - n \times \text{lattice parameter of Au}|}{\text{lattice parameter of KTaO}_3}$$

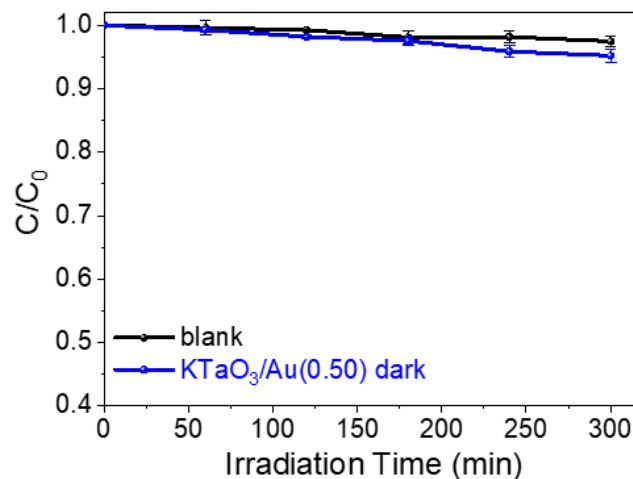

**Figure 1.** The degradation curves of p-nitrophenol with KTaO<sub>3</sub>/Au(0.5) in dark condition.

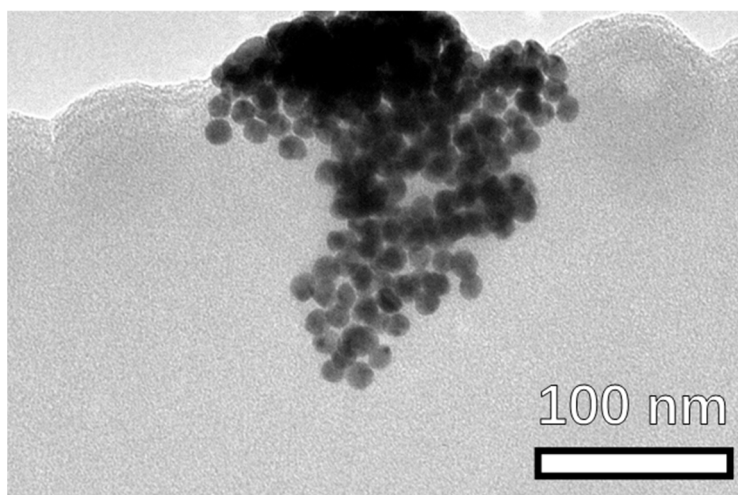

**Figure 2.** The TEM image of the single Au nanoparticles.

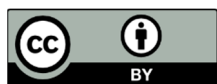

© 2019 by the authors. Submitted for possible open access publication under the terms and conditions of the Creative Commons Attribution (CC BY) license (<http://creativecommons.org/licenses/by/4.0/>).
